# Supplementary material for: Quantum dot-doped CeOx–NiB with modulated electron density as a highly efficient bifunctional electrocatalyst for water splitting
Source: Royal Society of Chemistry journal article supplement (doi:10.1039/d2nr06561d), 2023-01-01
Supplement: d2nr06561d1.pdf [file d2nr06561d1.pdf]

## Supplementary Information

### Quantum dots doped CeO<sub>x</sub>-NiB with modulated electron density as highly efficient bifunctional electrocatalyst for water splitting

Huimin Wang,<sup>‡a</sup> Tao Feng,<sup>‡a</sup> Lincai Wang,<sup>\*,a</sup> Weiju Hao<sup>\*,b</sup>

<sup>a</sup> School of Resource and Environmental Engineering, Shanghai Polytechnic University, Shang Hai 201209, P. R. China.

<sup>b</sup> University of Shanghai for Science and Technology, Shanghai 200093, P. R. China.

<sup>‡</sup>These authors are equal to this work.

\*Corresponding Authors:

Tel: 86-15821074895. E-mail: lcbwang@sspu.edu.cn (L.C. Wang); wjhao@usst.edu.cn (W.J. Hao).

Correspondence and requests for materials should be addressed to L.C. Wang (E-mail: lcbwang@sspu.edu.cn)

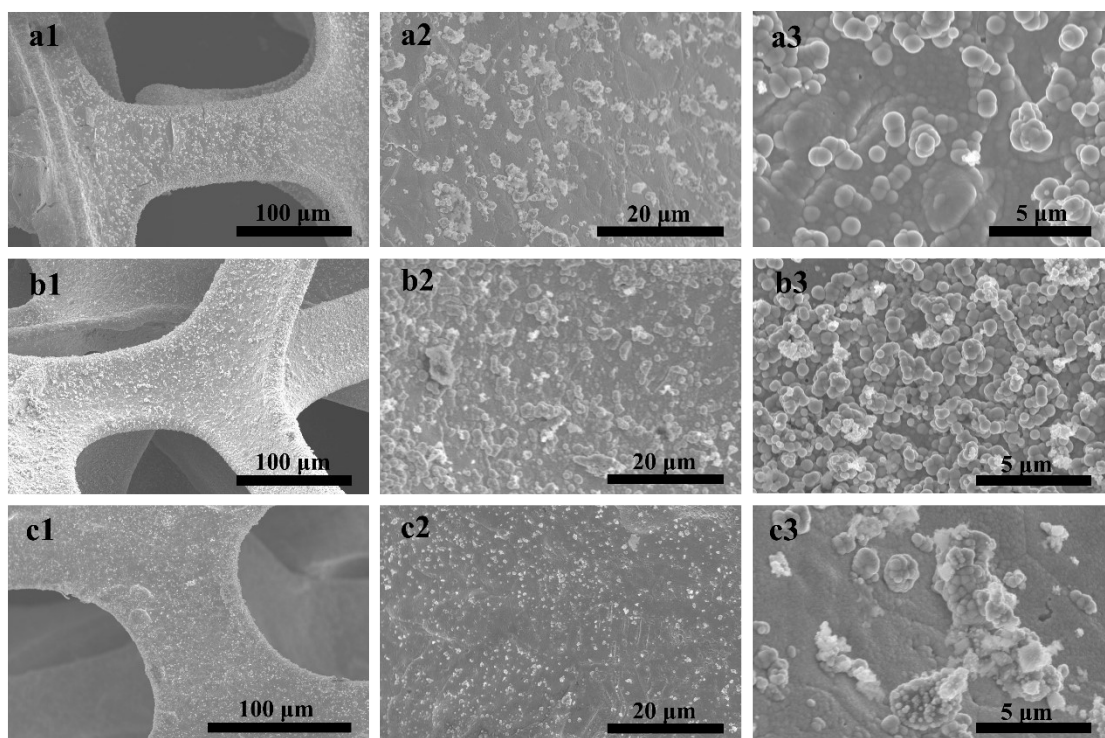

**Fig. S1.** SEM images of  $\text{CeO}_x\text{-NiB/SiC@NF}$  with different additions of SiC (a) 0.02 g; (b) 0.04 g and (c) 0.06 g.

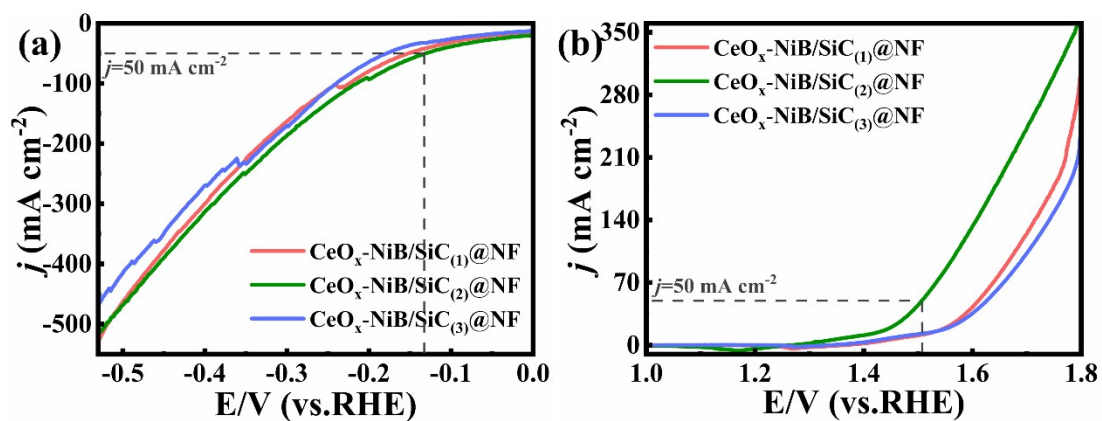

**Fig. S2.** LSV curves of HER and OER of CeO<sub>x</sub>-NiB/SiC@NF with different SiC doping amounts.

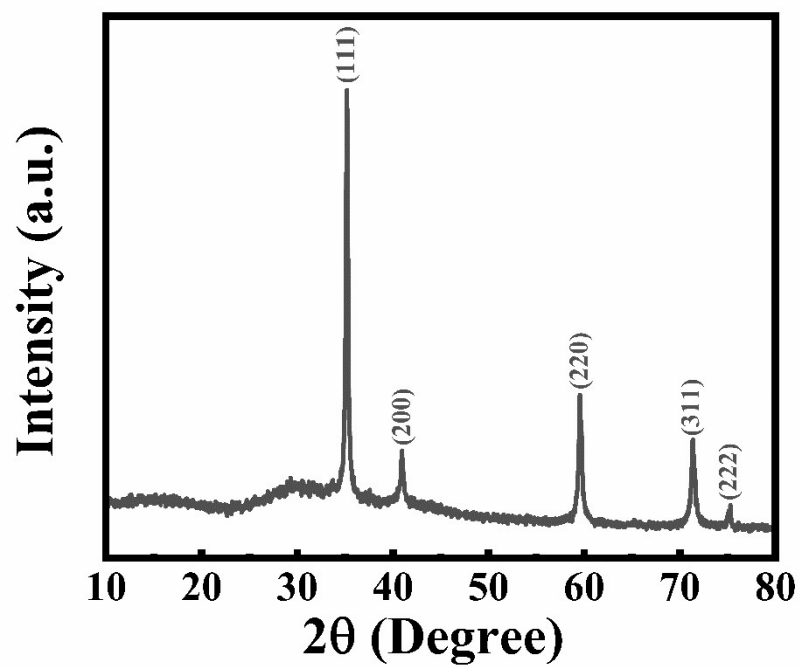

Fig. S3. XRD pattern of SiC powder

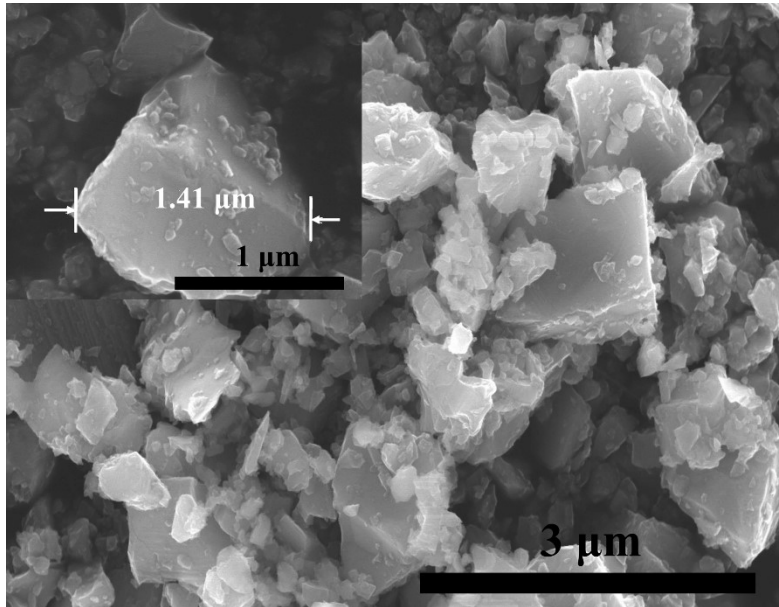

**Fig. S4.** FESEM image of SiC powder

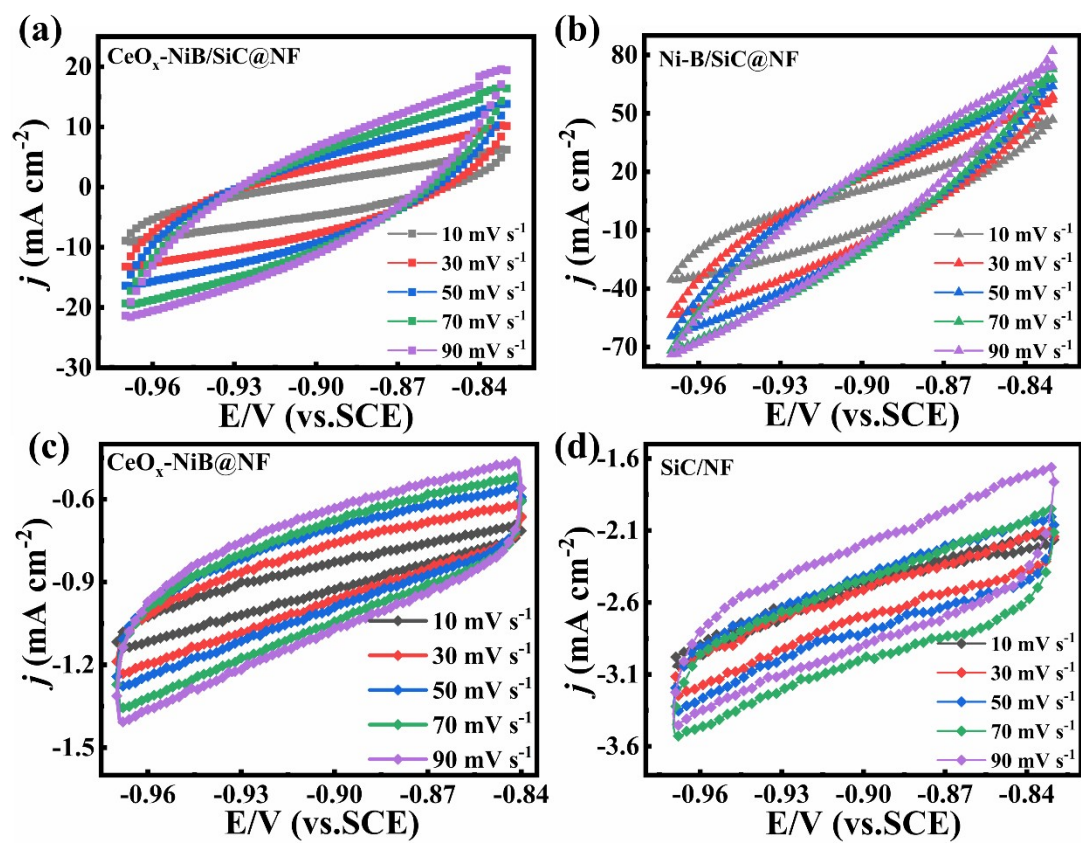

**Fig. S5.** (a-d) Cyclic voltammograms of CeO<sub>x</sub>-NiB/SiC@NF, Ni-B/SiC@NF, CeO<sub>x</sub>-NiB@NF and SiC/NF electrodes at different scan rates in 1.0 M KOH for HER.

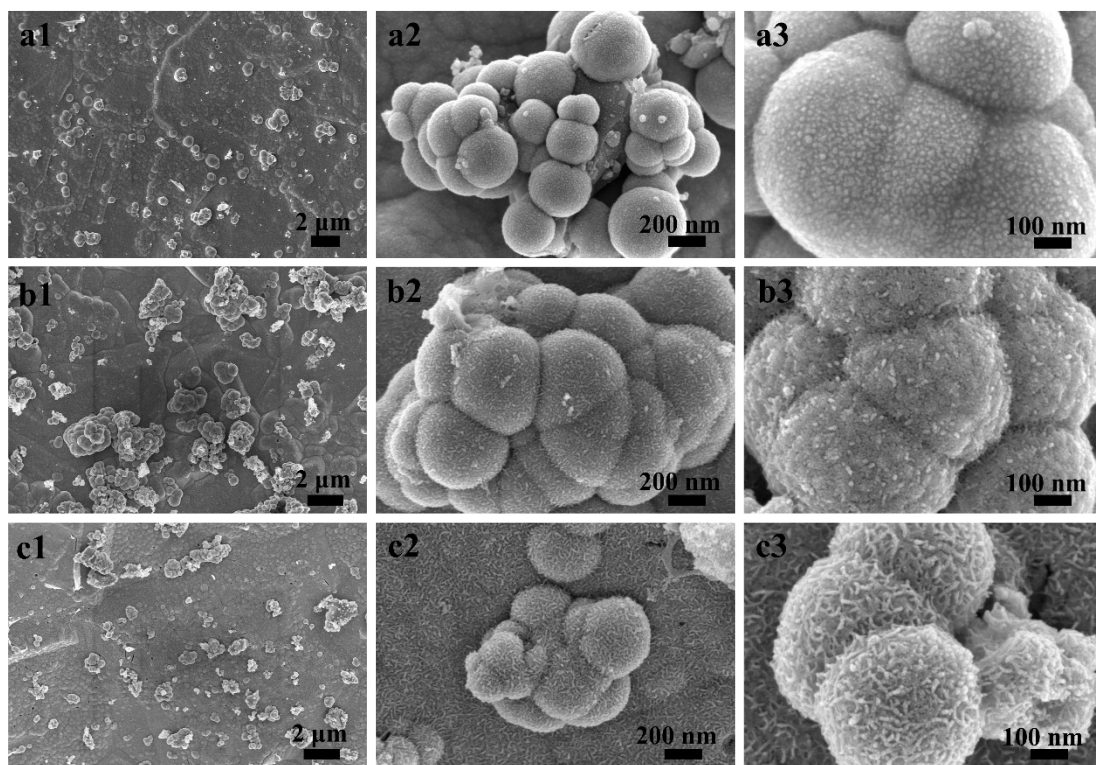

**Fig. S6.** (a-c) The FESEM images of original, post-HER and post-OER  $\text{CeO}_x\text{-NiB/SiC@NF}$  electrode.

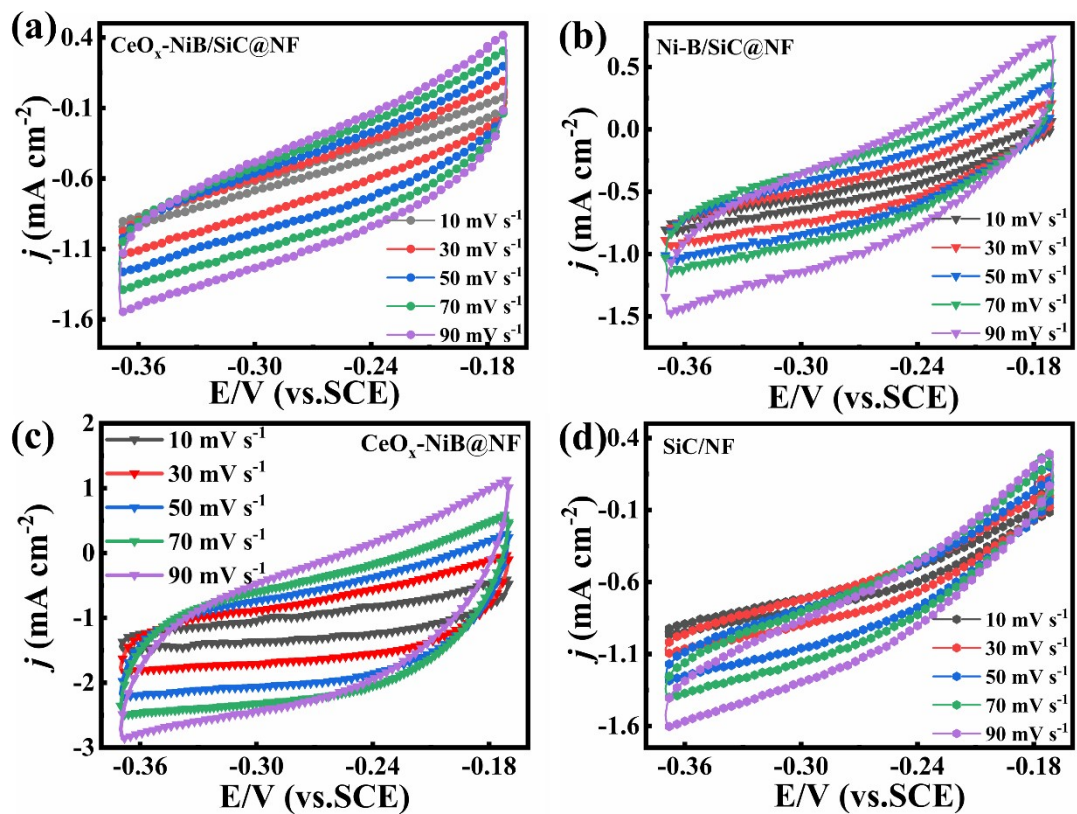

**Fig. S7.** (a-d) Cyclic voltammograms of  $\text{CeO}_x\text{-NiB/SiC@NF}$ ,  $\text{Ni-B/SiC@NF}$ ,  $\text{CeO}_x\text{-NiB@NF}$  and  $\text{SiC/NF}$  electrodes at different scan rates in 1.0 M KOH for OER.



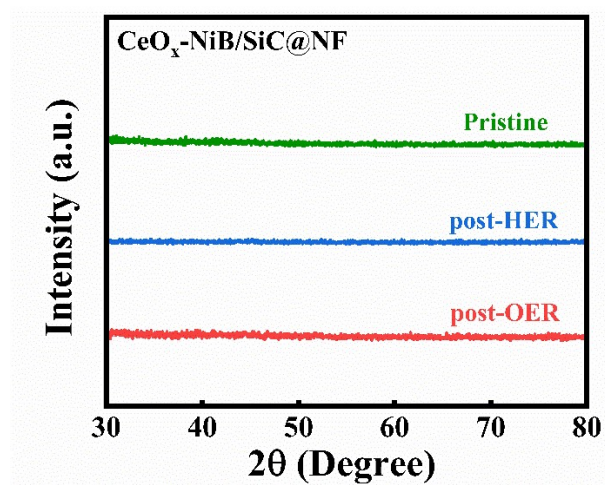

**Fig. S8.** XRD comparison pattern for pristine CeO<sub>x</sub>-NiB/SiC@NF and after HER and OER stability tests for 24 h.

**Table S1** ICP-AES test results of CeO<sub>x</sub>-NiB/SiC@NF and Ni-B/SiC@NF samples

| Element                      | Ni    | Ce   | Si   | B    | Ni: Ce: Si: B       |
|------------------------------|-------|------|------|------|---------------------|
| CeO <sub>x</sub> -NiB/SiC@NF | 14.6  | 1.19 | 0.35 | 7    | 2.08: 0.17: 0.05: 1 |
| Ni-B/SiC@NF                  | 246.9 | 0    | 0.94 | 23.5 | 10.5: 0: 0.04: 1    |

**Table S2** Comparison of the HER catalytic performance of CeO<sub>x</sub>-NiB/SiC@NF and other electrocatalyst electrodes in 1.0 M KOH.

| Catalysts                                                           | Electrolyte | j (mA·cm <sup>-2</sup> ) | Potential (mV) | Reference |
|---------------------------------------------------------------------|-------------|--------------------------|----------------|-----------|
| CeO <sub>x</sub> -NiB/SiC@NF                                        | 1M KOH      | 50                       | 131            | This work |
| NX600C                                                              | 1M KOH      | 50                       | 290            | 1         |
| Co <sub>1-x</sub> Fe <sub>x</sub> -LDH                              | 1M KOH      | 50                       | 273            | 2         |
| (Ni <sub>0.33</sub> Fe <sub>0.67</sub> ) <sub>2</sub>               | 1M KOH      | 50                       | 214            | 3         |
| A-CFWO                                                              | 1M KOH      | 50                       | 248            | 4         |
| Mn-NiCoP                                                            | 1M KOH      | 50                       | 142            | 5         |
| S-0.80                                                              | 1M KOH      | 50                       | 144            | 6         |
| CoSAs-MoS <sub>2</sub> /TiN NRs                                     | 1M KOH      | 50                       | 232.8          | 7         |
| Co-NiS@MoS <sub>2</sub>                                             | 1M KOH      | 50                       | 139.9          | 8         |
| NiCoDPA                                                             | 1M KOH      | 50                       | 253            | 9         |
| 5% Co-MoS <sub>2</sub> /NiS <sub>2</sub> /CC                        | 1M KOH      | 50                       | 162            | 10        |
| S-0.80                                                              | 1M KOH      | 50                       | 205            | 11        |
| Ni/Mo <sub>2</sub> C@NCe-0.15                                       | 1M KOH      | 50                       | 138            | 12        |
| CoP/rGO/NF-3                                                        | 1M KOH      | 50                       | 136            | 13        |
| B-Ni                                                                | 1M KOH      | 50                       | 235            | 14        |
| NiMo <sub>3</sub> S <sub>4</sub> /CTs                               | 1M KOH      | 50                       | 252.8          | 15        |
| Cu-(a-NiSe <sub>x</sub> /c-NiSe <sub>2</sub> )/TiO <sub>2</sub> NRs | 1M KOH      | 50                       | 374.5          | 16        |
| NMCP@NF                                                             | 1M KOH      | 50                       | 143            | 17        |
| NiFe-MS/MOS@NF                                                      | 1M KOH      | 50                       | 156            | 18        |
| NiCoPO@NC/P-NF-e                                                    | 1M KOH      | 50                       | 122.7          | 19        |
| Ni-Mo-S/MoO <sub>x</sub> /NF                                        | 1M KOH      | 50                       | 180            | 20        |

**Table S3** Comparison of the OER catalytic performance of CeO<sub>x</sub>-NiB/SiC@NF and other electrocatalyst electrodes in 1.0 M KOH.

| <b>Catalysts</b>                                                 | <b>Electrolyte</b> | <b><i>j</i> (mA·cm<sup>-2</sup>)</b> | <b>Potential (mV)</b> | <b>Reference</b> |
|------------------------------------------------------------------|--------------------|--------------------------------------|-----------------------|------------------|
| CeO <sub>x</sub> -NiB/SiC@NF                                     | 1M KOH             | 10                                   | 234                   | This work        |
| CeO <sub>x</sub> -NiB@NF                                         | 1M KOH             | 10                                   | 274                   | 21               |
| CoP/EEBP                                                         | 1M KOH             | 10                                   | 335                   | 22               |
| CoB@CoBi-800                                                     | 1M KOH             | 10                                   | 291                   | 23               |
| CoNiB@NF-500                                                     | 1M KOH             | 10                                   | 313                   | 24               |
| Ni <sub>x</sub> B-300                                            | 1M KOH             | 10                                   | 380                   | 25               |
| Ni <sub>x</sub> B/f-MWCNT                                        | 1M KOH             | 10                                   | 286                   | 26               |
| NiCoB                                                            | 1M KOH             | 10                                   | 300                   | 27               |
| NiCoBO <sub>x</sub>                                              | 1M KOH             | 10                                   | 290                   | 28               |
| Ni <sub>3</sub> B/rGO                                            | 1M KOH             | 10                                   | 290                   | 29               |
| NiB <sub>0.45</sub> -250/Cu                                      | 1M KOH             | 10                                   | 296                   | 30               |
| CoB/NF-200                                                       | 1M KOH             | 10                                   | 315                   | 31               |
| NGNF                                                             | 1M KOH             | 10                                   | 340                   | 32               |
| CuO@Cu <sub>3</sub> P                                            | 1M KOH             | 10                                   | 267                   | 33               |
| FeCoNiB@B-VG                                                     | 1M KOH             | 10                                   | 387                   | 34               |
| P-NiSe <sub>2</sub> @N-CNTs/NC                                   | 1M KOH             | 10                                   | 306                   | 35               |
| RRMC-500                                                         | 1M KOH             | 10                                   | 260                   | 36               |
| NiS <sub>2</sub> @V <sub>2</sub> O <sub>5</sub> /VS <sub>2</sub> | 1M KOH             | 10                                   | 333                   | 37               |
| Mo-CoP <sub>x</sub> /NF                                          | 1M KOH             | 10                                   | 268                   | 38               |
| Co <sub>0.21</sub> Fe <sub>0.28</sub> (OH)F                      | 1M KOH             | 10                                   | 193                   | 39               |
| NMCP@NF                                                          | 1M KOH             | 10                                   | 250                   | 17               |
| 3D porous P-MoO <sub>3</sub>                                     | 1M KOH             | 10                                   | 179                   | 40               |
| FCL MXene/NF                                                     | 1M KOH             | 10                                   | 179                   | 40               |

**Table S4** Comparison of the overall water splitting performance of CeO<sub>x</sub>-NiB/SiC@NF and other electrocatalyst electrodes in 1.0 M KOH.

| Catalysts                                                                                                                                | Electrolyte | j (mA·cm <sup>-2</sup> ) | Potential (V) | Reference |
|------------------------------------------------------------------------------------------------------------------------------------------|-------------|--------------------------|---------------|-----------|
| CeO <sub>x</sub> -NiB/SiC@NF  CeO <sub>x</sub> -NiB/SiC@NF                                                                               | 1M KOH      | 10                       | 1.437         | This work |
| FeIr/NF  FeIr/NF                                                                                                                         | 1M KOH      | 10                       | 1.48          | 41        |
| Ni <sub>0.93</sub> Ir <sub>0.07</sub> /rGO  Ni <sub>0.93</sub> Ir <sub>0.07</sub> /rGO                                                   | 1M KOH      | 10                       | 1.52          | 42        |
| Co <sub>5</sub> Fe <sub>5</sub> -C  Co <sub>5</sub> Fe <sub>5</sub> -C                                                                   | 1M KOH      | 10                       | 1.46          | 43        |
| NiFeOH/CoS <sub>x</sub> /NF  NiFeOH/CoS <sub>x</sub> /NF                                                                                 | 1M KOH      | 10                       | 1.563         | 44        |
| Ni <sub>2</sub> P/Co <sub>2</sub> P  Ni <sub>2</sub> P/Co <sub>2</sub> P                                                                 | 1M KOH      | 10                       | 1.57          | 45        |
| Co <sub>3</sub> S <sub>4</sub> /CeO <sub>2</sub> -CF  Co <sub>3</sub> S <sub>4</sub> /CeO <sub>2</sub> -CF                               | 1M KOH      | 10                       | 1.64          | 46        |
| CeO <sub>2</sub> -NiCoP <sub>x</sub> /NCF  CeO <sub>2</sub> -NiCoP <sub>x</sub> /NCF                                                     | 1M KOH      | 10                       | 1.49          | 47        |
| Ru@Co-B/Ni  Ru@Co-B/Ni                                                                                                                   | 1M KOH      | 10                       | 1.66          | 48        |
| Mo <sub>2</sub> NiB <sub>2</sub>   Mo <sub>2</sub> NiB <sub>2</sub>                                                                      | 1M KOH      | 10                       | 1.57          | 49        |
| Fe <sub>1</sub> Mn <sub>1</sub> @BN-PCFs  Fe <sub>1</sub> Mn <sub>1</sub> @BN-PCFs                                                       | 1M KOH      | 10                       | 1.622         | 50        |
| Ni <sub>x</sub> Fe <sub>1-x</sub> B-2  Ni <sub>x</sub> Fe <sub>1-x</sub> B-2                                                             | 1M KOH      | 10                       | 1.57          | 51        |
| C3  C3                                                                                                                                   | 1M KOH      | 10                       | 1.55          | 52        |
| Fe <sub>3</sub> N@Co <sub>4</sub> N@CoFe  Fe <sub>3</sub> N@Co <sub>4</sub> N@CoFe                                                       | 1M KOH      | 10                       | 1.59          | 53        |
| Co(OH) <sub>2</sub>   Co(OH) <sub>2</sub>                                                                                                | 1M KOH      | 10                       | 1.61          | 54        |
| MoP-Mo <sub>2</sub> C/NPC  MoP-Mo <sub>2</sub> C/NPC                                                                                     | 1M KOH      | 10                       | 1.55          | 55        |
| CMC/750SA  CMC/750SA                                                                                                                     | 1M KOH      | 10                       | 1.589         | 56        |
| Co <sub>9</sub> S <sub>8</sub> @NiFe-LDH-200  Co <sub>9</sub> S <sub>8</sub> @NiFe-LDH-200                                               | 1M KOH      | 10                       | 1.585         | 57        |
| 50MCNP@NF  50MCNP@NF                                                                                                                     | 1M KOH      | 10                       | 1.45          | 58        |
| Ni <sub>x</sub> S <sub>y</sub> @MnO <sub>x</sub> H <sub>y</sub> /NF  Ni <sub>x</sub> S <sub>y</sub> @MnO <sub>x</sub> H <sub>y</sub> /NF | 1M KOH      | 10                       | 1.530         | 59        |
| P-MoO <sub>3</sub> FCL MXene/NF  P-MoO <sub>3</sub> FCL MXene/NF                                                                         | 1M KOH      | 10                       | 1.53          | 40        |

|                  |        |    |      |    |
|------------------|--------|----|------|----|
| NiCoPO@NC/P-NF-e |        |    |      |    |
| NiCoPO@NC/P-NF-e | 1M KOH | 10 | 1.50 | 19 |

---

## References

- 1 N. Shaikh, I. Mukhopadhyay and A. Ray, *J. Mater. Chem. A*, 2022, **10**, 12733-12746.
- 2 G. Rajeshkhanna, T. I. Singh, N. H. Kim and J. H. Lee, *ACS Appl Mater Interfaces*, 2018, **10**, 42453-42468.
- 3 Y. Li, H. Zhang, M. Jiang, Q. Zhang, P. He and X. Sun, *Adv. Funct. Mater.*, 2017, **27**, 1702513.
- 4 A. Muthurasu, G. P. Ojha, M. Lee and H. Y. Kim, *Electrochim. Acta*, 2020, **334**, 135537.
- 5 X. Yu, S. Xu, Z. Wang, X. Cheng, Y. Du, G. Chen, X. Sun and Q. Wu, *Nanoscale*, 2021, **13**, 11069-11076.
- 6 Y. H. Wu, Y. Zhang, Y. X. Wang, Z. He, Z. J. Gu and S. C. You, *Int. J. Hydrogen Energy*, 2021, **46**, 26930-26939.
- 7 T. L. L. Doan, D. C. Nguyen, S. Prabhakaran, D. H. Kim, D. T. Tran, N. H. Kim and J. H. Lee, *Adv. Funct. Mater.*, 2021, **31**, 2100233.
- 8 H. Gao, J. Zang, Y. Wang, S. Zhou, P. Tian, S. Song, X. Tian and W. Li, *Electrochim. Acta*, 2021, **377**, 138051.
- 9 P. Bhanja, B. Mohanty, S. Chongdar, A. Bhaumik, B. K. Jena and S. Basu, *ACS Appl. Energy Mater.*, 2021, **4**, 12827-12835.
- 10 Y. Zheng, J. Rong, J. Xu, Y. Zhu, T. Zhang, D. Yang and F. Qiu, *Appl. Surf. Sci.*, 2021, **563**, 150385.
- 11 Z. Zhang, Y. Wu and D. Zhang, *Int. J. Hydrogen Energy*, 2022, **47**, 1425-1434.
- 12 R. Ge, J. Zhao, J. Huo, J. Qu, J. Yang, Y. Li, M. Zhu, J. M. Cairney, R. Zheng, S. Li, J. Zhang, B. Liu and W. Li, *Mater. Today Nano*, 2022, **20**, 100248.
- 13 Z. Yang, R. He, H. Wu, Y. Ding and H. Mei, *Int. J. Hydrogen Energy*, 2021, **46**, 9690-9698.
- 14 T. Zhang, F. Song, Y. Qian, H. Gao, J. Shaw and Y. Rao, *ACS Appl. Energy Mater.*, 2021, **4**, 5434-5442.
- 15 D. Kong, Y. Wang, S. Huang, Y. V. Lim, M. Wang, T. Xu, J. Zang, X. Li and H. Y. Yang, *J. Colloid Interface Sci.*, 2022, **607**, 1876-1887.
- 16 K. R. Park, D. T. Tran, T. T. Nguyen, N. H. Kim and J. H. Lee, *Chem. Eng. J.*, 2021, **422**, 130048.
- 17 M. R. Kandel, U. N. Pan, D. R. Paudel, P. P. Dhakal, N. H. Kim and J. H. Lee, *Composites, Part B*, 2022, **239**, 109992.
- 18 M. Zhao, W. Li, J. Li, W. Hu and C. M. Li, *Adv Sci (Weinh)*, 2020, **7**, 2001965.
- 19 H. Gao, Y. Wang, S. Zhou, S. Song, X. Tian, W. Li, Y. Yuan and J. Zang, *Chem. Eng. J.*, 2021, **426**, 130854.
- 20 Z. Han, X. Liang, S. Wang, L. Zhou and Z. Zhao, *Mater. Lett.*, 2019, **246**, 63-66.
- 21 H. Wang, H. Liu, T. Feng, L. Wang, W. Yuan, Q. Huang and Y. Guo, *Dalton Trans.*, 2022, **51**, 675-684.
- 22 T. Liang, Y. Liu, P. Zhang, C. Liu, F. Ma, Q. Yan and Z. Dai, *Chem. Eng. J.*, 2020, **395**, 124976.
- 23 T. Tan, P. Han, H. Cong, G. Cheng and W. Luo, *ACS Sustainable Chem. Eng.*, 2019, **7**, 5620-5625.
- 24 N. Xu, G. Cao, Z. Chen, Q. Kang, H. Dai and P. Wang, *J. Mater. Chem. A*, 2017, **5**, 12379-12384.
- 25 J. Masa, I. Sinev, H. Mistry, E. Ventosa, M. de la Mata, J. Arbiol, M. Muhler, B. Roldan Cuenya and W. Schuhmann, *Adv. Energy Mater.*, 2017, **7**, 1700381.
- 26 X. Chen, Z. Yu, L. Wei, Z. Zhou, S. Zhai, J. Chen, Y. Wang, Q. Huang, H. E. Karahan, X. Liao and Y. Chen, *J. Mater. Chem. A*, 2019, **7**, 764-774.
- 27 S. Wang, P. He, Z. Xie, L. Jia, M. He, X. Zhang, F. Dong, H. Liu, Y. Zhang and C. Li,

- Electrochim. Acta*, 2019, **296**, 644-652.
- 28 M. Ramadoss, Y. Chen, Y. Hu and D. Yang, *Electrochim. Acta*, 2019, **321**, 134666.
- 29 M. Arivu, J. Masud, S. Umapathi and M. Nath, *Electrochem. Commun.*, 2018, **86**, 121-125.
- 30 J. Jiang, M. Wang, W. Yan, X. Liu, J. Liu, J. Yang and L. Sun, *Nano Energy*, 2017, **38**, 175-184.
- 31 Z. Chen, Q. Kang, G. Cao, N. Xu, H. Dai and P. Wang, *Int. J. Hydrogen Energy*, 2018, **43**, 6076-6087.
- 32 D. Navadeepthy, A. Rebekah, C. Viswanthan and N. Ponpandian, *Int. J. Hydrogen Energy*, 2021, **46**, 21512-21524.
- 33 S. Lv, J. Li, B. Zhang, Y. Shi, X. Liu and T. Wang, *Int. J. Hydrogen Energy*, 2022, **47**, 9593-9605.
- 34 B. Jiang, K. Liang, Z. Yang, K. Guo, F. Shaik and J. Zheng, *Electrochim. Acta*, 2021, **386**, 138459.
- 35 J. Yu, W.-J. Li, G. Kao, C.-Y. Xu, R. Chen, Q. Liu, J. Liu, H. Zhang and J. Wang, *J. Energy Chem.*, 2021, **60**, 111-120.
- 36 Y. Fan, X. Zhang, Y. Zhang, X. Xie, J. Ding, J. Cai, B. Li, H. Lv, L. Liu, M. Zhu, X. Zheng, Q. Cai, Y. Liu and S. Lu, *J. Colloid Interface Sci.*, 2021, **604**, 508-516.
- 37 Z. Yang, X. Xie, Z. Zhang, J. Yang, C. Yu, S. Dong, M. Xiang and H. Qin, *Int. J. Hydrogen Energy*, 2022, **47**, 27338-27346.
- 38 Y. Yu, J. Li, J. Luo, Z. Kang, C. Jia, Z. Liu, W. Huang, Q. Chen, P. Deng, Y. Shen and X. Tian, *Mater. Today Nano*, 2022, **18**, 100216.
- 39 Y. Li, X. Zhai, C. Fan, X. Chen, Y. Liu, J. Yang, L. Chen, G. Ge and J. Zhang, *J. Mater. Chem. A*, 2022, **10**, 11774-11783.
- 40 M. Li, R. Sun, Y. Li, J. Jiang, W. Xu, H. Cong and S. Han, *Chem. Eng. J.*, 2022, **431**, 133941.
- 41 F. Shen, Y. Wang, G. Qian, W. Chen, W. Jiang, L. Luo and S. Yin, *Appl. Catal., B*, 2020, **278**, 119327.
- 42 S. Zhang, X. Zhang, X. Shi, F. Zhou, R. Wang and X. Li, *J. Energy Chem.*, 2020, **49**, 166-173.
- 43 Y. Yan, Y. Han, F. Wang, Y. Hu, Q. Shi, G. Diao and M. Chen, *J. Alloys Compd.*, 2022, **897**, 163126.
- 44 R. Bose, V. R. Jothi, K. Karupphasamy, A. Alfantazi and S. C. Yi, *J. Mater. Chem. A*, 2020, **8**, 13795-13805.
- 45 H. Liu, M. Jin, D. Zhan, J. Wang, X. Cai, Y. Qiu and L. Lai, *Appl. Catal., B*, 2020, **272**, 118951.
- 46 Z. Feng, J. Pu, M. Liu, W. Zhang, X. Zhang, L. Cui and J. Liu, *J. Colloid Interface Sci.*, 2022, **613**, 806-813.
- 47 S. Wen, J. Huang, T. Li, W. Chen, G. Chen, Q. Zhang, X. Zhang, Q. Qian and K. Ostrikov, *Appl. Catal., B*, 2022, **316**, 121678.
- 48 L. Chen, B. Lu, J. Zhang, R. Wu and Y. Guo, *J. Colloid Interface Sci.*, 2022, **623**, 897-904.
- 49 A. Saad, Y. Gao, K. A. Owusu, W. Liu, Y. Wu, A. Ramiere, H. Guo, P. Tsiakaras and X. Cai, *Small*, 2022, **18**, e2104303.
- 50 Z. Liu, F. Guo, L. Cheng, X. Bo, T. Liu and M. Li, *J. Colloid Interface Sci.*, 2022, **629**, 179-192.
- 51 W. Hong, S. Sun, Y. Kong, Y. Hu and G. Chen, *J. Mater. Chem. A*, 2020, **8**, 7360-7367.
- 52 D. Chinnadurai, R. Rajendiran and P. Kandasamy, *J. Colloid Interface Sci.*, 2022, **606**, 101-112.
- 53 Z. Cui, X. Liang, P. Wang, P. Zhou, Q. Zhang, Z. Wang, Z. Zheng, Y. Liu, Y. Dai and B. Huang, *Electrochim. Acta*, 2021, **395**, 139218.
- 54 M. Duraivel, S. Nagappan, K. H. Park and K. Prabakar, *Electrochim. Acta*, 2022, **411**, 140071.

- 55 E. Jiang, J. Li, X. Li, A. Ali, G. Wang, S. Ma, P. Kang Shen and J. Zhu, *Chem. Eng. J.*, 2022, **431**, 133719.
- 56 W. Yaseen, M. Xie, B. A. Yusuf, Y. Xu, N. Ullah, M. Rafiq, A. Ali and J. Xie, *Appl. Surf. Sci.*, 2022, **579**, 152148.
- 57 Y. Lu, C. Liu, Y. Xing, Q. Xu, A. M. S. Hossain, D. Jiang, D. Li and J. Zhu, *J. Colloid Interface Sci.*, 2021, **604**, 680-690.
- 58 Y. Zhang, H. Liu, R. Ge, J. Yang, S. Li, Y. Liu, L. Feng, Y. Li, M. Zhu and W. Li, *Sustainable Mater. Technol.*, 2022, **33**, e00461.
- 59 P. Wang, Y. Luo, G. Zhang, Z. Chen, H. Ranganathan, S. Sun and Z. Shi, *Nano-Micro Lett.*, 2022, **14**, 120.
